# Supplementary material for: Two-step thermotropic phase transition and dielectric relaxation in 1D supramolecular lead iodide perovskite [NH4@18-crown ether]PbI3
Source: Royal Society of Chemistry journal article supplement (doi:10.1039/d2dt02621j), 2022-01-01
Supplement: d2dt02621j1.pdf [file d2dt02621j1.pdf]

# **Two-step thermotropic phase transition and dielectric relaxation in 1D supramolecular lead iodide perovskite [NH<sub>4</sub>@18-crown ether]PbI<sub>3</sub>**

Yu-Xin Xie<sup>a</sup> Guo-Jun Yuan<sup>\*a</sup> Ji-Bin Miao<sup>a</sup> Ye-Ting Luan<sup>a</sup> Li Li<sup>a</sup> Hong Chen<sup>a</sup> Xiao-Ming Ren<sup>\*b</sup>

<sup>a</sup> Key Laboratory of Advanced Functional Materials of Nanjing, Department of Chemistry, Nanjing Xiaozhuang University, Nanjing 211171, P. R. China

<sup>b</sup> State Key Laboratory of Materials-Oriented Chemical Engineering and College of Chemistry and molecular of Engineering, Nanjing Tech University, Nanjing 211816, P. R. China

Tel.: +86 25 58139476

Email: [ahchljygj@163.com](mailto:ahchljygj@163.com) (GJY); [xmren@njtech.edu.cn](mailto:xmren@njtech.edu.cn) (XMR)

## Contents

Fig. S1: Comparison of simulated and experimental Powder X-ray diffraction profiles for **1**.

Fig. S2: TG plot for **1** in the temperature range of 303–1068 K.

Fig S3: (a) Solid state UV-visible spectrum at ambient condition (Inset: photo of crystal **1**) and (b) Tauc plot obtained by the Kubelka-Munk function transformation for **1**, and the optical bandgap is estimated to be 2.57 eV.

Fig. S4: Straight face-sharing  $\{\text{PbI}_3\}_\infty$  chain linked to  $[\text{NH}_4(18\text{-crown-6})]^+$  through charge-assisted H...I for **1** at 293 K.

Fig. S5: (a, b and c) Straight face-sharing  $\{\text{PbI}_3\}_\infty$  chain linked to  $[\text{NH}_4(18\text{-crown-6})]^+$  through charge-assisted H...I; (d) Packing diagram viewed along the b-axes for **1** at 363 K.

Fig. S6: (a, b and c) Straight face-sharing  $\{\text{PbI}_3\}_\infty$  chain linked to  $[\text{NH}_4(18\text{-crown-6})]^+$  through charge-assisted H...I; (d) Packing diagram viewed along the b-axes for **1** at 403 K.

Fig. S7: The shortest N...I distances in **1** between 100 and 403 K.

Table S1: Crystal data and structure refinements for **1** at 100, 150, 200, 273, 293, 323, 363 and 403 K

Table S2: Distortion parameters for each  $\text{PbI}_6$  octahedron at the selected temperatures

Table S3: Selected bond lengths / Å for **1** at HTP at 100 K

Table S4: Selected bond lengths / Å for **1** at LTP at 150 K

Table S5: Selected bond lengths / Å for **1** at LTP at 200 K

Table S6: Selected bond lengths / Å for **1** at LTP at 273 K

Table S7: Selected bond lengths / Å for **1** at LTP at 293 K

Table S8: Selected bond lengths / Å for **1** at LTP at 323 K

Table S9: Selected bond lengths / Å for **1** at LTP at 363 K

Table S10: Selected bond lengths / Å for **1** at LTP at 403 K

Table S11: Selected bond Angle / ° for **1** at LTP at 100 K

Table S12: Selected bond Angle / ° for **1** at LTP at 150 K

Table S13: Selected bond Angle / ° for **1** at LTP at 200 K

Table S14: Selected bond Angle / ° for **1** at LTP at 273 K

Table S15: Selected bond Angle / ° for **1** at LTP at 293 K

Table S16: Selected bond Angle / ° for **1** at LTP at 323 K

Table S17: Selected bond Angle / ° for **1** at LTP at 363 K

Table S18: Selected bond Angle / ° for **1** at LTP at 403 K

Table S19: The parameters of  $U_{eq}$  in **1** at 100, 150, 200, 273, 293, 323, 363 and 403 K

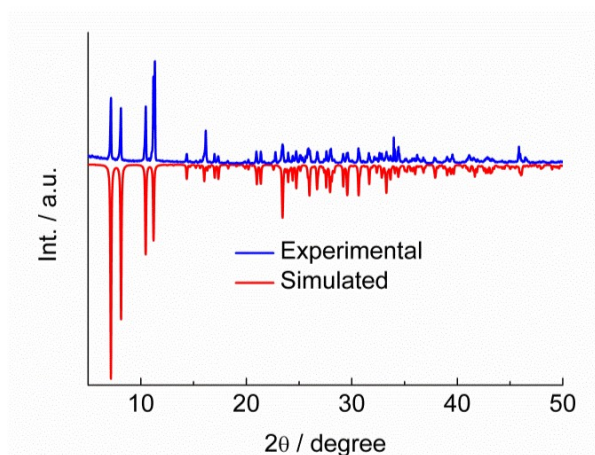

Fig. S1: Comparison of simulated and experimental Powder X-ray diffraction profiles for **1**.

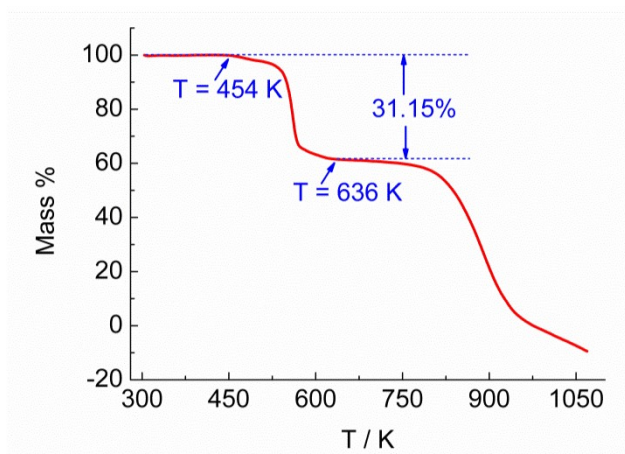

Fig. S2: TG plot for **1** in the temperature range of 303-1068 K.

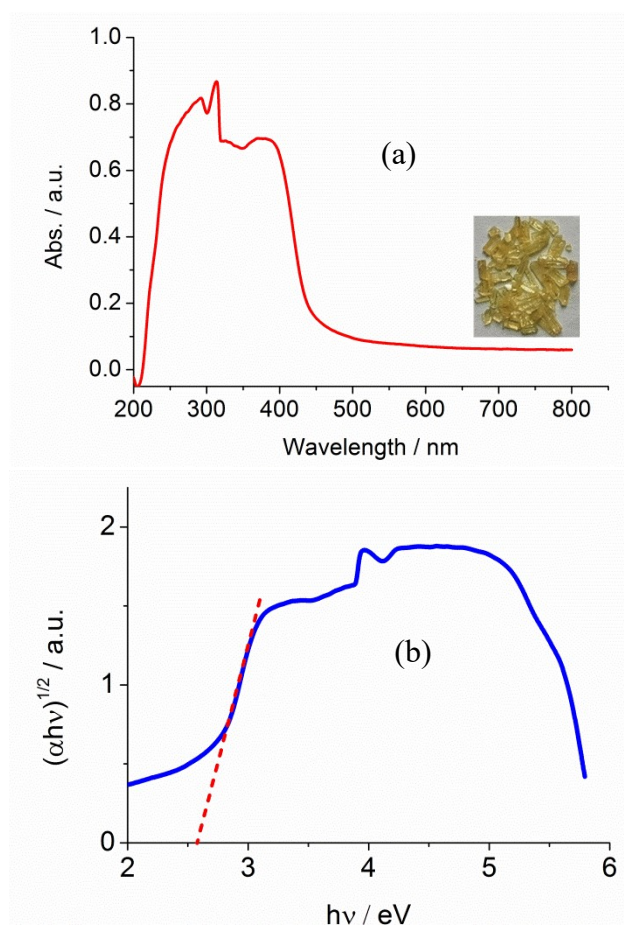

Fig S3: (a) Solid state UV-visible spectrum at ambient condition (Inset: photo of crystal **1**) and (b) Tauc plot obtained by the Kubelka-Munk function transformation for **1**, and the optical bandgap is estimated to be 2.57 eV.

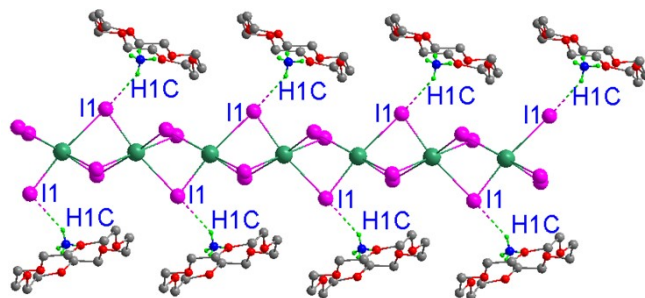

Fig. S4: Straight face-sharing  $\{\text{PbI}_3\}_\infty$  chain linked to  $[\text{NH}_4(18\text{-crown-6})]^+$  through charge-assisted H...I for **1** at 293 K.

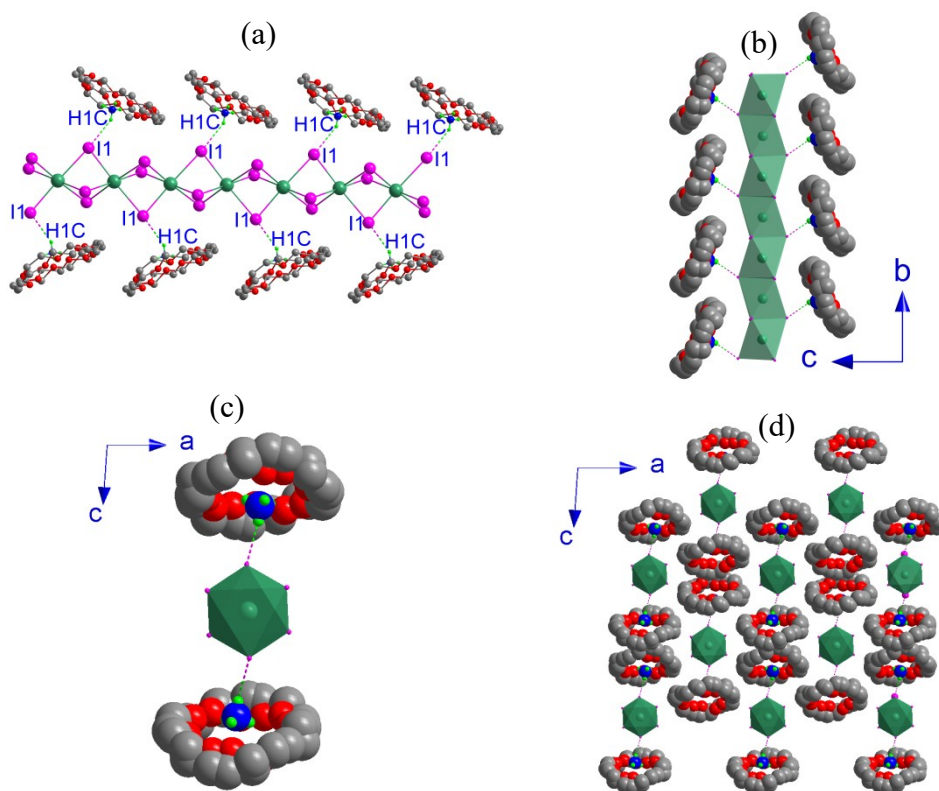

Fig. S5: (a, b and c) Straight face-sharing  $\{\text{PbI}_3\}_\infty$  chain linked to  $[\text{NH}_4(18\text{-crown-6})]^+$  through charge-assisted H...I; (d) Packing diagram viewed along the b-axes for **1** at 363 K.

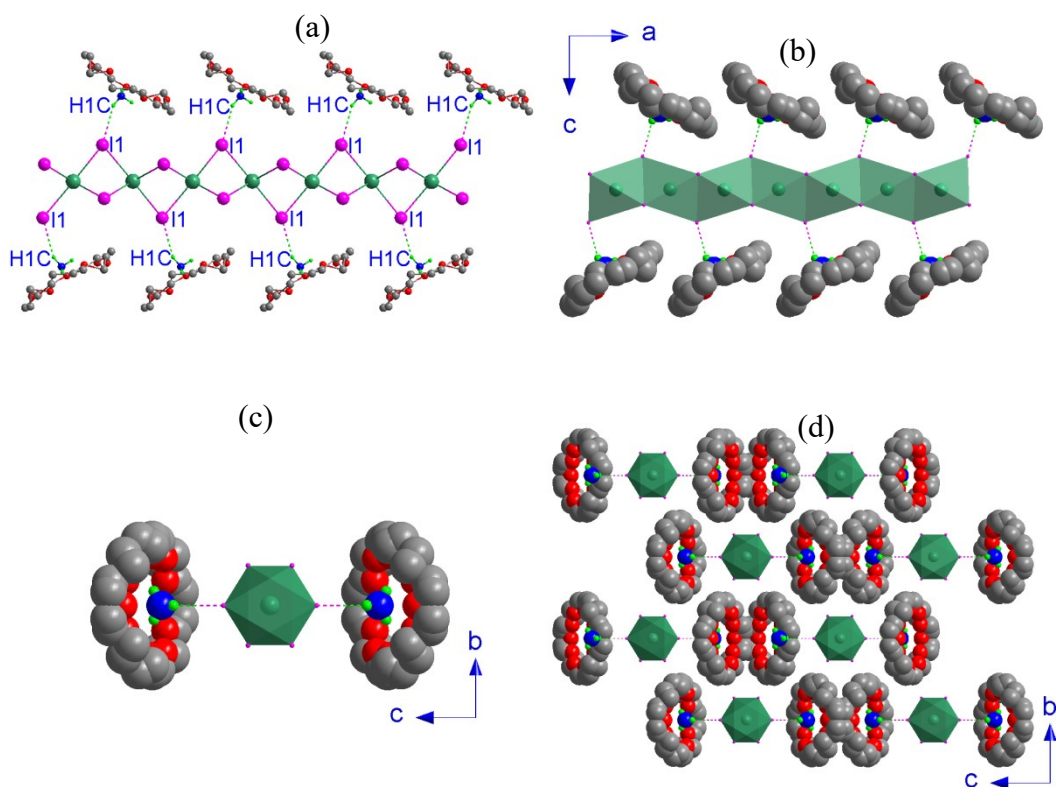

Fig. S6: (a, b and c) Straight face-sharing  $\{\text{PbI}_3\}_\infty$  chain linked to  $[\text{NH}_4(18\text{-crown-6})]^+$  through charge-assisted H...I; (d) Packing diagram viewed along the *b*-axes for **1** at 403 K.

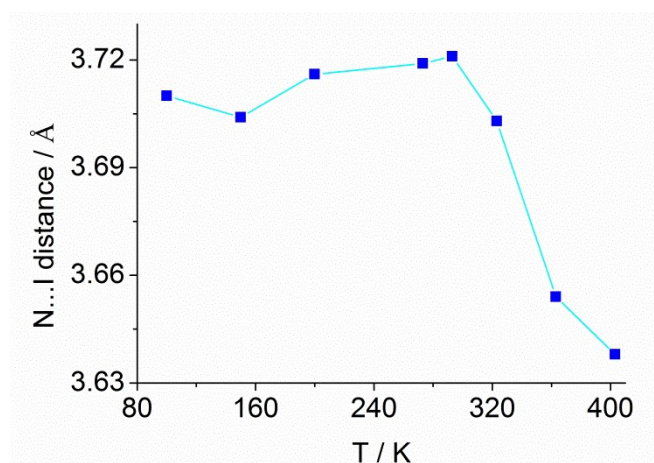

Fig. S7: The shortest N...I distances in **1** between 100 and 403 K.

Table S1: Crystal data and structure refinements for **1** at 100, 150, 200, 273 and 323

K

|                                              |                                             |                                             |                                             |                                             |                                             |
|----------------------------------------------|---------------------------------------------|---------------------------------------------|---------------------------------------------|---------------------------------------------|---------------------------------------------|
| Temp./K                                      | 100                                         | 150                                         | 200                                         | 273                                         | 323                                         |
| SG                                           | P2 <sub>1</sub> /n                          |
| CCDC no.                                     | 2111959                                     | 2111960                                     | 2111962                                     | 2111963                                     | 2111965                                     |
| Crystal system                               | Monoclinic                                  | Monoclinic                                  | Monoclinic                                  | Monoclinic                                  | Monoclinic                                  |
| a (Å)                                        | 15.9602(7)                                  | 15.9485(6)                                  | 15.9465(6)                                  | 15.9434(6)                                  | 15.9339(7)                                  |
| b (Å)                                        | 8.6135(3)                                   | 8.6219(3)                                   | 8.6266(3)                                   | 8.6315(3)                                   | 8.5831(3)                                   |
| c (Å)                                        | 16.5827(7)                                  | 16.6746(7)                                  | 16.7569(7)                                  | 16.9273(7)                                  | 17.2046(8)                                  |
| α (°)                                        | 90                                          | 90                                          | 90                                          | 90                                          | 90                                          |
| β (°)                                        | 98.3610(10)                                 | 98.1810(10)                                 | 97.9190(10)                                 | 97.4200(10)                                 | 96.483(2)                                   |
| γ (°)                                        | 90                                          | 90                                          | 90                                          | 90                                          | 90                                          |
| V(Å <sup>3</sup> )/Z                         | 2255.45(16) /4                              | 2269.53(15)/4                               | 2283.17(15)/4                               | 2309.95(15)/4                               | 2337.89(17)/4                               |
| ρ (g·cm <sup>-3</sup> )                      | 2.563                                       | 2.547                                       | 2.532                                       | 2.502                                       | 2.472                                       |
| F(000)                                       | 1584                                        | 1584                                        | 1584                                        | 1584                                        | 1584                                        |
| Abs. coeff. (mm <sup>-1</sup> )              | 11.609                                      | 11.537                                      | 11.468                                      | 11.335                                      | 11.200                                      |
| θ Ranges/°                                   | 2.58-24.999                                 | 2.692-25.01                                 | 2.454-25.004                                | 2.427-25.002                                | 2.38-25.01                                  |
| Index ranges                                 | -18 ≤ h ≤ 17<br>-9 ≤ k ≤ 10<br>-19 ≤ l ≤ 17 | -18 ≤ h ≤ 18<br>-9 ≤ k ≤ 10<br>-19 ≤ l ≤ 18 | -18 ≤ h ≤ 18<br>-9 ≤ k ≤ 10<br>-19 ≤ l ≤ 18 | -18 ≤ h ≤ 18<br>-9 ≤ k ≤ 10<br>-20 ≤ l ≤ 18 | -17 ≤ h ≤ 18<br>-9 ≤ k ≤ 10<br>-20 ≤ l ≤ 19 |
| R <sub>int</sub>                             | 0.0434                                      | 0.0419                                      | 0.0444                                      | 0.0443                                      | 0.0607                                      |
| Indep. refl/<br>restr.                       | 3913/<br>217/                               | 3958/<br>217/                               | 3982/<br>217/                               | 4022/<br>217/                               | 4086/<br>217/                               |
| /para.                                       | 209                                         | 209                                         | 209                                         | 209                                         | 209                                         |
| Goodness of fit on F <sup>2</sup>            | 1.123                                       | 1.108                                       | 1.125                                       | 1.099                                       | 1.042                                       |
| R <sub>1</sub> , wR <sub>2</sub> [I > 2σ(I)] | 0.0305<br>0.0749                            | 0.0280<br>0.0686                            | 0.0316<br>0.0740                            | 0.0322<br>0.0707                            | 0.0404<br>0.1039                            |
| R <sub>1</sub> , wR <sub>2</sub> [all data]  | 0.0335<br>0.0765                            | 0.0320<br>0.0707                            | 0.0367<br>0.0760                            | 0.0408<br>0.0739                            | 0.0565<br>0.1115                            |
| Residual (e·Å <sup>-3</sup> )                | 1.066/<br>-2.519                            | 1.141/<br>-2.265                            | 1.152/<br>-1.628                            | 1.021/<br>-0.919                            | 0.856/<br>-0.945                            |

$$R_1 = \frac{\sum ||F_o| - |F_c||}{\sum |F_o|}, wR_2 = \left[ \frac{\sum w(F_o^2 - F_c^2)^2}{\sum w(F_o^2)^2} \right]^{1/2}$$



Table S2: Distortion parameters for each  $\text{PbI}_6$  octahedron at the selected temperatures

|                                      | 100K   | 150K   | 200K   | 273K   | 293K   | 323K   | 363K   | 403K   |
|--------------------------------------|--------|--------|--------|--------|--------|--------|--------|--------|
| $d_m [\text{\AA}]$                   | 3.2724 | 3.2746 | 3.2765 | 3.2792 | 3.2781 | 3.2738 | 3.2553 | 3.2474 |
| $\Delta_{\text{oct}} \times 10^{-3}$ | 3.258  | 3.195  | 3.137  | 2.966  | 2.731  | 2.269  | 0.551  | 0.145  |
| $\sigma_{\text{oct}}^2$              | 98.849 | 97.419 | 95.578 | 92.324 | 88.959 | 82.718 | 59.302 | 48.380 |

Table S3: Selected bond lengths /  $\text{\AA}$  for **1** at LTP at 100 K

| Bond         | Bond lengths | Bond        | Bond lengths | Bond      | Bond lengths |
|--------------|--------------|-------------|--------------|-----------|--------------|
| Pb(1)-I(1)   | 3.0626(6)    | N(1)-I(1)   | 8.1594(65)   | N(1)-O(1) | 2.9206(82)   |
| Pb(1)-I(1)#1 | 3.5176(6)    | N(1)-I(1)#1 | 10.6847(68)  | N(1)-O(2) | 2.9878(86)   |
| Pb(1)-I(2)   | 3.2855(5)    | N(1)-I(2)   | 7.0775(70)   | N(1)-O(3) | 2.9204(81)   |
| Pb(1)-I(2)#2 | 3.2117(5)    | N(1)-I(2)#2 | 11.2312(66)  | N(1)-O(4) | 3.0753(79)   |
| Pb(1)-I(3)   | 3.0534(6)    | N(1)-I(3)   | 7.3661(65)   | N(1)-O(5) | 2.814(8)     |
| Pb(1)-I(3)#3 | 3.5035(6)    | N(1)-I(3)#3 | 10.9356(68)  | N(1)-O(6) | 3.1122(76)   |
| Mean bond    | 3.2724       | Mean bond   | 9.2424       | Mean bond |              |

Symmetry transformations used to generate equivalent atoms:

$$\#1 = -x+1/2, y-1/2, -z+1/2$$

$$\#2 = -x+1/2, y-1/2, -z+1/2$$

$$\#3 = -x+1/2, y+1/2, -z+1/2$$

Table S4: Selected bond lengths /  $\text{\AA}$  for **1** at LTP at 150 K

| Bond         | Bond lengths | Bond        | Bond lengths | Bond      | Bond lengths |
|--------------|--------------|-------------|--------------|-----------|--------------|
| Pb(1)-I(1)   | 3.0670(5)    | N(1)-I(1)   | 8.1378(49)   | N(1)-O(1) | 2.9258(69)   |
| Pb(1)-I(1)#1 | 3.5251 (5)   | N(1)-I(1)#1 | 10.6994(52)  | N(1)-O(2) | 2.9879(73)   |
| Pb(1)-I(2)   | 3.2805(5)    | N(1)-I(2)   | 7.0941(52)   | N(1)-O(3) | 2.9242(68)   |
| Pb(1)-I(2)#2 | 3.2206(5)    | N(1)-I(2)#2 | 11.2246(50)  | N(1)-O(4) | 3.0715 (67)  |
| Pb(1)-I(3)   | 3.0573(6)    | N(1)-I(3)   | 7.3675(51)   | N(1)-O(5) | 2.8147(68)   |
| Pb(1)-I(3)#3 | 3.4972(6)    | N(1)-I(3)#3 | 10.9394(52)  | N(1)-O(6) | 3.1091(65)   |
| Mean bond    | 3.2746       | Mean bond   | 9.2438       |           |              |

Symmetry transformations used to generate equivalent atoms:

$$\#1 = -x+1/2, y-1/2, -z+1/2$$

$$\#2 = -x+1/2, y-1/2, -z+1/2$$

$$\#3 = -x+1/2, y+1/2, -z+1/2$$

Table S5: Selected bond lengths / Å for **1** at LTP at 200 K

| Bond         | Bond lengths | Bond        | Bond lengths | Bond      | Bond lengths |
|--------------|--------------|-------------|--------------|-----------|--------------|
| Pb(1)-I(1)   | 3.0686(6)    | N(1)-I(1)   | 8.1220(65)   | N(1)-O(1) | 2.9378(82)   |
| Pb(1)-I(1)#1 | 3.5331(6)    | N(1)-I(1)#1 | 10.7110(68)  | N(1)-O(2) | 2.9902(86)   |
| Pb(1)-I(2)   | 3.2771(6)    | N(1)-I(2)   | 7.0982(70)   | N(1)-O(3) | 2.9164(81)   |
| Pb(1)-I(2)#2 | 3.2311(6)    | N(1)-I(2)#2 | 11.2275(66)  | N(1)-O(4) | 3.0483 (80)  |
| Pb(1)-I(3)   | 3.0612(6)    | N(1)-I(3)   | 7.3773(65)   | N(1)-O(5) | 2.8079(80)   |
| Pb(1)-I(3)#3 | 3.4876(6)    | N(1)-I(3)#3 | 10.9373(68)  | N(1)-O(6) | 3.1000(76)   |
| Mean bond    | 3.2765       | Mean bond   | 9.2456       |           |              |

Symmetry transformations used to generate equivalent atoms:

$$\#1 = -x+1/2, y-1/2, -z+1/2$$

$$\#2 = -x+1/2, y-1/2, -z+1/2$$

$$\#3 = -x+1/2, y+1/2, -z+1/2$$

Table S6: Selected bond lengths / Å for **1** at LTP at 273 K

| Bond         | Bond lengths | Bond        | Bond lengths | Bond      | Bond lengths |
|--------------|--------------|-------------|--------------|-----------|--------------|
| Pb(1)-I(1)   | 3.0752(6)    | N(1)-I(1)   | 8.0891(65)   | N(1)-O(1) | 2.9289(79)   |
| Pb(1)-I(1)#1 | 3.5426(6)    | N(1)-I(1)#1 | 10.7178(67)  | N(1)-O(2) | 2.9795 (97)  |
| Pb(1)-I(2)   | 3.2662(6)    | N(1)-I(2)   | 7.1098(70)   | N(1)-O(3) | 2.9226(84)   |
| Pb(1)-I(2)#2 | 3.2510(6)    | N(1)-I(2)#2 | 11.2173(64)  | N(1)-O(4) | 3.0326 (74)  |
| Pb(1)-I(3)   | 3.0710(6)    | N(1)-I(3)   | 7.3758(63)   | N(1)-O(5) | 2.8082(79)   |
| Pb(1)-I(3)#3 | 3.4692(6)    | N(1)-I(3)#3 | 10.9358(68)  | N(1)-O(6) | 3.0820(82)   |
| Mean bond    | 3.2792       | Mean bond   | 9.2409       |           |              |

Symmetry transformations used to generate equivalent atoms:

$$\#1 = -x+1/2, y-1/2, -z+1/2$$

$$\#2 = -x+1/2, y-1/2, -z+1/2$$

$$\#3 = -x+1/2, y+1/2, -z+1/2$$

Table S7: Selected bond lengths / Å for **1** at LTP at 293 K

| Bond         | Bond lengths | Bond        | Bond lengths | Bond      | Bond lengths |
|--------------|--------------|-------------|--------------|-----------|--------------|
| Pb(1)-I(1)   | 3.0825(6)    | N(1)-I(1)   | 8.0649(65)   | N(1)-O(1) | 2.9247(84)   |
| Pb(1)-I(1)#1 | 3.5391(6)    | N(1)-I(1)#1 | 10.7023(67)  | N(1)-O(2) | 2.9662(97)   |
| Pb(1)-I(2)   | 3.2530(6)    | N(1)-I(2)   | 7.107(7)     | N(1)-O(3) | 2.9281(86)   |
| Pb(1)-I(2)#2 | 3.2637(6)    | N(1)-I(2)#2 | 11.2012(64)  | N(1)-O(4) | 3.0312(74)   |
| Pb(1)-I(3)   | 3.0800(6)    | N(1)-I(3)   | 7.3648(63)   | N(1)-O(5) | 2.8099(89)   |
| Pb(1)-I(3)#3 | 3.4503(6)    | N(1)-I(3)#3 | 10.9263(68)  | N(1)-O(6) | 3.0617(85)   |
| Mean bond    | 3.2781       | Mean bond   | 9.2278       |           |              |

Symmetry transformations used to generate equivalent atoms:

$$\#1 = -x+1/2, y-1/2, -z+1/2$$

$$\#2 = -x+1/2, y-1/2, -z+1/2$$

$$\#3 = -x+1/2, y+1/2, -z+1/2$$

Table S8: Selected bond lengths / Å for **1** at LTP at 323 K

| Bond         | Bond lengths | Bond        | Bond lengths | Bond      | Bond lengths |
|--------------|--------------|-------------|--------------|-----------|--------------|
| Pb(1)-I(1)   | 3.0959(7)    | N(1)-I(1)   | 8.0498(66)   | N(1)-O(1) | 2.9249(106)  |
| Pb(1)-I(1)#1 | 3.5198(7)    | N(1)-I(1)#1 | 10.6962(75)  | N(1)-O(2) | 2.9709(115)  |
| Pb(1)-I(2)   | 3.2319(6)    | N(1)-I(2)   | 7.1280(78)   | N(1)-O(3) | 2.9492 (109) |
| Pb(1)-I(2)#2 | 3.2784(6)    | N(1)-I(2)#2 | 11.1975(67)  | N(1)-O(4) | 3.0268(92)   |
| Pb(1)-I(3)   | 3.0979(8)    | N(1)-I(3)   | 7.3643(68)   | N(1)-O(5) | 2.8099(93)   |
| Pb(1)-I(3)#3 | 3.4188(8)    | N(1)-I(3)#3 | 10.9414(73)  | N(1)-O(6) | 3.0424(101)  |
| Mean bond    | 3.2738       | Mean bond   | 9.2295       |           |              |

Symmetry transformations used to generate equivalent atoms:

$$\#1 = -x+1/2, y-1/2, -z+1/2$$

$$\#2 = -x+1/2, y-1/2, -z+1/2$$

$$\#3 = -x+1/2, y+1/2, -z+1/2$$

Table S9: Selected bond lengths / Å for **1** at LTP at 363 K

| Bond         | Bond lengths | Bond        | Bond lengths | Bond       | Bond lengths |
|--------------|--------------|-------------|--------------|------------|--------------|
| Pb(1)-I(1)   | 3.1903(8)    | N(1)-I(1)   | 3.6550(85)   | N(1)-O(1)  | 2.9936(176)  |
| Pb(1)-I(1)#1 | 3.3860(8)    | N(1)-I(1)#1 | 8.5892(88)   | N(1)-O(1)A | 2.9037(201)  |
| Pb(1)-I(2)   | 3.1769(8)    | N(1)-I(2)   | 5.1698(83)   | N(1)-O(2)  | 3.0098(174)  |
| Pb(1)-I(2)#2 | 3.2913(8)    | N(1)-I(2)#2 | 7.7135(89)   | N(1)-O(2)A | 2.7584(178)  |
| Pb(1)-I(3)   | 3.1890(7)    | N(1)-I(3)   | 7.1849(86)   | N(1)-O(3)  | 3.0581(158)  |
| Pb(1)-I(3)#3 | 3.2988(7)    | N(1)-I(3)#3 | 5.9078(86)   | N(1)-O(3)A | 2.9302(184)  |
|              |              |             |              | N(1)-O(4)  | 2.7932(163)  |
|              |              |             |              | N(1)-O(4)A | 2.905(22)    |
|              |              |             |              | N(1)-O(5)  | 2.9493(173)  |
|              |              |             |              | N(1)-O(5)A | 3.0778(196)  |
|              |              |             |              | N(1)-O(6)  | 2.8505(170)  |
|              |              |             |              | N(1)-O(6)A | 2.9726(189)  |
| Mean bond    | 3.2553       | Mean bond   | 6.3700       |            |              |

Symmetry transformations used to generate equivalent atoms:

$$\#1 = -x+3/2, y+1/2, -z+1/2$$

$$\#2 = -x+3/2, y-1/2, -z+1/2$$

$$\#3 = -x+3/2, y+1/2, -z+1/2$$

Table S10: Selected bond lengths / Å for **1** at LTP at 403 K

| Bond         | Bond lengths | Bond        | Bond lengths | Bond         | Bond lengths |
|--------------|--------------|-------------|--------------|--------------|--------------|
| Pb(1)-I(1)   | 3.2652(12)   | N(1)-I(1)   | 3.6384(128)  | N(1)-O(1)    | 2.8531(270)  |
| Pb(1)-I(1)#1 | 3.2914(12)   | N(1)-I(1)#1 | 10.0741(128) | N(1)-O(1)#5  | 2.8531(270)  |
| Pb(1)-I(2)   | 3.1933(9)    | N(1)-I(2)   | 7.4679(121)  | N(1)-O(1)A   | 3.1810(434)  |
| Pb(1)-I(2)#2 | 3.2706(9)    | N(1)-I(2)#2 | 7.5434(123)  | N(1)-O(2)    | 2.8568(243)  |
| Pb(1)-I(2)#3 | 3.1933(9)    | N(1)-I(2)#3 | 7.4679(121)  | N(1)-O(2)#6  | 2.8568(243)  |
| Pb(1)-I(2)#4 | 3.2706(9)    | N(1)-I(2)#4 | 7.5434(123)  | N(1)-O(2)A   | 3.0183(273)  |
|              |              |             |              | N(1)-O(2)A#7 | 3.0183(273)  |
|              |              |             |              | N(1)-O(3)    | 2.8740(263)  |
|              |              |             |              | N(1)-O(3)#8  | 2.8740(273)  |
|              |              |             |              | N(1)-O(3)A   | 3.1094(311)  |
|              |              |             |              | N(1)-O(3)A#9 | 3.1094(311)  |
|              |              |             |              | N(1)-O(4)A   | 2.9430(389)  |
| Mean bond    | 3.2474       | Mean bond   | 7.2892       |              |              |

Symmetry transformations used to generate equivalent atoms:

$$\#1 = x-1/2, -y+3/2, -z+1/2$$

$$\#2 = x+1/2, -y+3/2, -z+1/2$$

$$\#3 = x, -y+3/2, z$$

$$\#4 = x+1/2, y, -z+1/2$$

$$\#5 = x, -y+3/2, z$$

$$\#6 = x, -y+3/2, z$$

$$\#7 = x, -y+3/2, z$$

$$\#8 = x, -y+3/2, z$$

$$\#9 = x, -y+3/2, z$$

Table S11: Selected bond Angle / ° for **1** at LTP at 100 K

| Bond                | Angle/°     | Bond                 | Angle/°     |
|---------------------|-------------|----------------------|-------------|
| ∠I(1)-Pb(1)-I(2)    | 84.286(14)  | ∠I(2)-Pb(1)-I(3)     | 94.225(14)  |
| ∠I(1)-Pb(1)-I(3) #3 | 81.344(15)  | ∠I(3)#3-Pb(1)-I(1)#1 | 106.776(14) |
| ∠I(1)-Pb(1)-I(2) #2 | 94.253(14)  | ∠I(3)#3-Pb(1)-I(2)#2 | 101.230(14) |
| ∠I(1)-Pb(1)-I(3)    | 91.394(15)  | ∠I(1)#1-Pb(1)-I(2)#2 | 78.464(13)  |
| ∠I(2)-Pb(1)-I(3)#3  | 78.159(13)  | ∠I(1)#1-Pb(1)-I(3)   | 81.236(15)  |
| ∠I(2)-Pb(1)-I(1)#1  | 103.036(13) | ∠I(2)#2-Pb(1)-I(3)   | 86.219(14)  |

Symmetry transformations used to generate equivalent atoms:

$$\#1 = -x+1/2, y-1/2, -z+1/2$$

$$\#2 = -x+1/2, y-1/2, -z+1/2$$

$$\#3 = -x+1/2, y+1/2, -z+1/2$$

Table S12: Selected bond Angle / ° for **1** at LTP at 150 K

| Bond                | Angle/°     | Bond                 | Angle/°     |
|---------------------|-------------|----------------------|-------------|
| ∠I(1)-Pb(1)-I(2)    | 84.344(13)  | ∠I(2)-Pb(1)-I(3)     | 94.478(12)  |
| ∠I(1)-Pb(1)-I(3) #3 | 81.528(13)  | ∠I(3)#3-Pb(1)-I(1)#1 | 106.279(12) |
| ∠I(1)-Pb(1)-I(2) #2 | 94.598(13)  | ∠I(3)#3-Pb(1)-I(2)#2 | 101.202(13) |
| ∠I(1)-Pb(1)-I(3)    | 91.695(13)  | ∠I(1)#1-Pb(1)-I(2)#2 | 78.278(13)  |
| ∠I(2)-Pb(1)-I(3)#3  | 78.265(13)  | ∠I(1)#1-Pb(1)-I(3)   | 81.202(13)  |
| ∠I(2)-Pb(1)-I(1)#1  | 102.818(13) | ∠I(2)#2-Pb(1)-I(3)   | 85.942(12)  |

Symmetry transformations used to generate equivalent atoms:

$$\#1 = -x+1/2, y-1/2, -z+1/2$$

$$\#2 = -x+1/2, y-1/2, -z+1/2$$

$$\#3 = -x+1/2, y+1/2, -z+1/2$$

Table S13: Selected bond Angle / ° for **1** at LTP at 200 K

| Bond                | Angle/°     | Bond                 | Angle/°     |
|---------------------|-------------|----------------------|-------------|
| ∠I(1)-Pb(1)-I(2)    | 84.453(15)  | ∠I(2)-Pb(1)-I(3)     | 94.675(14)  |
| ∠I(1)-Pb(1)-I(3) #3 | 81.734(15)  | ∠I(3)#3-Pb(1)-I(1)#1 | 105.767(14) |
| ∠I(1)-Pb(1)-I(2) #2 | 94.951(15)  | ∠I(3)#3-Pb(1)-I(2)#2 | 101.096(14) |
| ∠I(1)-Pb(1)-I(3)    | 92.066(16)  | ∠I(1)#1-Pb(1)-I(2)#2 | 78.093(15)  |
| ∠I(2)-Pb(1)-I(3)#3  | 78.464(14)  | ∠I(1)#1-Pb(1)-I(3)   | 81.088(15)  |
| ∠I(2)-Pb(1)-I(1)#1  | 102.539(15) | ∠I(2)#2-Pb(1)-I(3)   | 85.710(14)  |

Symmetry transformations used to generate equivalent atoms:

$$\#1 = -x+1/2, y-1/2, -z+1/2$$

$$\#2 = -x+1/2, y-1/2, -z+1/2$$

$$\#3 = -x+1/2, y+1/2, -z+1/2$$

Table S14: Selected bond Angle / ° for **1** at LTP at 273 K

| Bond                | Angle/°     | Bond                 | Angle/°     |
|---------------------|-------------|----------------------|-------------|
| ∠I(1)-Pb(1)-I(2)    | 84.643(16)  | ∠I(2)-Pb(1)-I(3)     | 95.000(15)  |
| ∠I(1)-Pb(1)-I(3) #3 | 82.086(15)  | ∠I(3)#3-Pb(1)-I(1)#1 | 104.835(14) |
| ∠I(1)-Pb(1)-I(2) #2 | 95.563(16)  | ∠I(3)#3-Pb(1)-I(2)#2 | 100.910(14) |
| ∠I(1)-Pb(1)-I(3)    | 92.703(17)  | ∠I(1)#1-Pb(1)-I(2)#2 | 77.796(15)  |
| ∠I(2)-Pb(1)-I(3)#3  | 78.888(14)  | ∠I(1)#1-Pb(1)-I(3)   | 80.940(15)  |
| ∠I(2)-Pb(1)-I(1)#1  | 102.021(15) | ∠I(2)#2-Pb(1)-I(3)   | 85.217(15)  |

Symmetry transformations used to generate equivalent atoms:

$$\#1 = -x+1/2, y-1/2, -z+1/2$$

$$\#2 = -x+1/2, y-1/2, -z+1/2$$

$$\#3 = -x+1/2, y+1/2, -z+1/2$$

Table S15: Selected bond Angle / ° for **1** at LTP at 293 K

| Bond                | Angle/°     | Bond                 | Angle/°     |
|---------------------|-------------|----------------------|-------------|
| ∠I(1)-Pb(1)-I(2)    | 84.803(16)  | ∠I(2)-Pb(1)-I(3)     | 95.145(15)  |
| ∠I(1)-Pb(1)-I(3) #3 | 82.337(16)  | ∠I(3)#3-Pb(1)-I(1)#1 | 104.121(15) |
| ∠I(1)-Pb(1)-I(2) #2 | 95.931(17)  | ∠I(3)#3-Pb(1)-I(2)#2 | 100.742(14) |
| ∠I(1)-Pb(1)-I(3)    | 93.116(18)  | ∠I(1)#1-Pb(1)-I(2)#2 | 77.731(15)  |
| ∠I(2)-Pb(1)-I(3)#3  | 79.328(14)  | ∠I(1)#1-Pb(1)-I(3)   | 80.917(16)  |
| ∠I(2)-Pb(1)-I(1)#1  | 101.536(15) | ∠I(2)#2-Pb(1)-I(3)   | 84.836(15)  |

Symmetry transformations used to generate equivalent atoms:

$$\#1 = -x+1/2, y-1/2, -z+1/2$$

$$\#2 = -x+1/2, y-1/2, -z+1/2$$

$$\#3 = -x+1/2, y+1/2, -z+1/2$$

Table S16: Selected bond Angle / ° for **1** at LTP at 323 K

| Bond                | Angle/°     | Bond                 | Angle/°     |
|---------------------|-------------|----------------------|-------------|
| ∠I(1)-Pb(1)-I(2)    | 84.917(19)  | ∠I(2)-Pb(1)-I(3)     | 95.157(17)  |
| ∠I(1)-Pb(1)-I(3) #3 | 82.717(18)  | ∠I(3)#3-Pb(1)-I(1)#1 | 102.948(17) |
| ∠I(1)-Pb(1)-I(2) #2 | 96.533(19)  | ∠I(3)#3-Pb(1)-I(2)#2 | 100.379(17) |
| ∠I(1)-Pb(1)-I(3)    | 93.67(2)    | ∠I(1)#1-Pb(1)-I(2)#2 | 77.791(16)  |
| ∠I(2)-Pb(1)-I(3)#3  | 80.160(17)  | ∠I(1)#1-Pb(1)-I(3)   | 81.041(18)  |
| ∠I(2)-Pb(1)-I(1)#1  | 100.733(16) | ∠I(2)#2-Pb(1)-I(3)   | 84.383(17)  |

Symmetry transformations used to generate equivalent atoms:

$$\#1 = -x+1/2, y-1/2, -z+1/2$$

$$\#2 = -x+1/2, y-1/2, -z+1/2$$

$$\#3 = -x+1/2, y+1/2, -z+1/2$$



Table S17: Selected bond Angle / ° for **1** at LTP at 363 K

| Bond                        | Angle/°  | Bond                         | Angle/°  |
|-----------------------------|----------|------------------------------|----------|
| $\angle$ I(1)-Pb(1)-I(2)    | 95.93(2) | $\angle$ I(2)-Pb(1)-I(3)     | 95.22(2) |
| $\angle$ I(1)-Pb(1)-I(3) #3 | 98.11(2) | $\angle$ I(3)#3-Pb(1)-I(1)#1 | 79.89(2) |
| $\angle$ I(1)-Pb(1)-I(2) #2 | 83.52(2) | $\angle$ I(3)#3-Pb(1)-I(2)#2 | 98.46(2) |
| $\angle$ I(1)-Pb(1)-I(3)    | 84.58(2) | $\angle$ I(1)#1-Pb(1)-I(2)#2 | 98.39(2) |
| $\angle$ I(2)-Pb(1)-I(3)#3  | 83.20(2) | $\angle$ I(1)#1-Pb(1)-I(3)   | 97.39(2) |
| $\angle$ I(2)-Pb(1)-I(1)#1  | 82.21(2) | $\angle$ I(2)#2-Pb(1)-I(3)   | 83.14(2) |

Symmetry transformations used to generate equivalent atoms:

$$\#1 = -x+3/2, y+1/2, -z+1/2$$

$$\#2 = -x+3/2, y-1/2, -z+1/2$$

$$\#3 = -x+3/2, y+1/2, -z+1/2$$

Table S18: Selected bond Angle / ° for **1** at LTP at 403 K

| Bond                       | Angle/°    | Bond                         | Angle/°    |
|----------------------------|------------|------------------------------|------------|
| $\angle$ I(1)-Pb(1)-I(2)   | 95.57(3)   | $\angle$ I(2)-Pb(1)-I(2)#4   | 95.64(2)   |
| $\angle$ I(1)-Pb(1)-I(2)#2 | 82.61(2)   | $\angle$ I(2)#1-Pb(1)-I(2)#2 | 98.442(14) |
| $\angle$ I(1)-Pb(1)-I(2)#3 | 95.57(3)   | $\angle$ I(2)#1-Pb(1)-I(2)#3 | 83.390(15) |
| $\angle$ I(1)-Pb(1)-I(2)#4 | 82.61(2)   | $\angle$ I(2)#1-Pb(1)-I(2)#4 | 98.442(14) |
| $\angle$ I(2)-Pb(1)-I(2)#1 | 83.390(15) | $\angle$ I(2)#2-Pb(1)-I(2)#3 | 95.64(2)   |
| $\angle$ I(2)-Pb(1)-I(2)#3 | 85.57(3)   | $\angle$ I(2)#2-Pb(1)-I(2)#4 | 83.09(3)   |

Symmetry transformations used to generate equivalent atoms:

$$\#1 = x-1/2, -y+3/2, -z+1/2$$

$$\#2 = x+1/2, -y+3/2, -z+1/2$$

$$\#3 = x, -y+3/2, z$$

$$\#4 = x+1/2, y, -z+1/2$$

Table S19: The parameters  $U_{eq}$  of non-H atoms in **1** at 100, 150, 200, 273, 293, 323, 363 and 403 K

| Non-H atom | 100K      | 150K      | 200K       | 273K      | 293K      | 323K      | 363K      | 403K      |
|------------|-----------|-----------|------------|-----------|-----------|-----------|-----------|-----------|
| Pb1        | 0.0113(1) | 0.0149(1) | 0.0208(1)  | 0.0311(1) | 0.0362(1) | 0.0438(2) | 0.0561(2) | 0.0675(3) |
| N1         | 0.015(1)  | 0.019(1)  | 0.024(1)   | 0.038(2)  | 0.043(2)  | 0.053(2)  | 0.077(2)  | 0.089(4)  |
| I1         | 0.0163(1) | 0.0227(1) | 0.0315(2)  | 0.0467(2) | 0.054(2)  | 0.064(2)  | 0.0807(3) | 0.0984(4) |
| I2         | 0.0141(1) | 0.0193(1) | 0.027(1)   | 0.0403(2) | 0.0466(2) | 0.0557(2) | 0.0821(3) | 0.0893(3) |
| I3         | 0.0156(1) | 0.0215(1) | 0.0298(2)  | 0.045(2)  | 0.0531(2) | 0.0645(2) | 0.0696(2) |           |
| O1         | 0.015(1)  | 0.02(1)   | 0.030(1)   | 0.049(1)  | 0.061(2)  | 0.086(2)  | 0.091(4)  | 0.147(6)  |
| O1A        |           |           |            |           |           |           | 0.094(5)  | 0.172(9)  |
| O2         | 0.016(1)  | 0.022(1)  | 0.032(1)   | 0.052(1)  | 0.067(2)  | 0.091(2)  | 0.095(5)  | 0.149(6)  |
| O2A        |           |           |            |           |           |           | 0.092(5)  | 0.175(6)  |
| O3         | 0.016(1)  | 0.022(1)  | 0.031(1)   | 0.051(1)  | 0.066(2)  | 0.093(2)  | 0.089(4)  | 0.135(6)  |
| O3A        |           |           |            |           |           |           | 0.100(5)  | 0.175(7)  |
| O4         | 0.014(1)  | 0.0198(9) | 0.029(1)   | 0.048(1)  | 0.060(2)  | 0.083(2)  | 0.097(4)  |           |
| O4A        |           |           |            |           |           |           | 0.116(6)  | 0.162(9)  |
| O5         | 0.016(1)  | 0.0217(9) | 0.03(1)    | 0.049(1)  | 0.061(2)  | 0.089(2)  | 0.103(5)  |           |
| O5A        |           |           |            |           |           |           | 0.100(5)  |           |
| O6         | 0.016(1)  | 0.0210(9) | 0.0309(12) | 0.052(1)  | 0.066(2)  | 0.092(2)  | 0.093(4)  |           |
| O6A        |           |           |            |           |           |           | 0.082(5)  |           |
| C1         | 0.019(2)  | 0.024(1)  | 0.0346(18) | 0.054(2)  | 0.068(2)  | 0.088(3)  | 0.107(6)  | 0.151(8)  |
| C1A        |           |           |            |           |           |           | 0.097(6)  | 0.171(8)  |
| C2         | 0.02(2)   | 0.026(1)  | 0.038(2)   | 0.056(2)  | 0.071(2)  | 0.084(3)  | 0.098(6)  | 0.158(7)  |
| C2A        |           |           |            |           |           |           | 0.096(6)  | 0.164(7)  |
| C3         | 0.018(2)  | 0.024(1)  | 0.037(2)   | 0.059(2)  | 0.075(2)  | 0.105(3)  | 0.103(6)  | 0.154(7)  |
| C3A        |           |           |            |           |           |           | 0.103(7)  | 0.178(7)  |
| C4         | 0.019(2)  | 0.024(1)  | 0.035(2)   | 0.057(2)  | 0.071(2)  | 0.097(3)  | 0.104(6)  | 0.145(7)  |
| C4A        |           |           |            |           |           |           | 0.110(7)  | 0.177(8)  |
| C5         | 0.018(2)  | 0.024(1)  | 0.034(2)   | 0.057(2)  | 0.072(2)  | 0.096(3)  | 0.099(6)  | 0.143(7)  |
| C5A        |           |           |            |           |           |           | 0.108(7)  | 0.26(3)   |
| C6         | 0.018(2)  | 0.024(1)  | 0.034(2)   | 0.054(2)  | 0.067(2)  | 0.082(3)  | 0.091(6)  | 0.146(8)  |
| C6A        |           |           |            |           |           |           | 0.108(6)  | 0.166(9)  |
| C7         | 0.017(2)  | 0.024(1)  | 0.032(2)   | 0.052(2)  | 0.070(2)  | 0.093(3)  | 0.106(6)  |           |
| C7A        |           |           |            |           |           |           | 0.105(6)  |           |
| C8         | 0.017(2)  | 0.022(1)  | 0.033(2)   | 0.052(2)  | 0.066(2)  | 0.088(3)  | 0.107(6)  |           |
| C8A        |           |           |            |           |           |           | 0.112(6)  |           |
| C9         | 0.019(2)  | 0.025(1)  | 0.036(2)   | 0.060(2)  | 0.074(2)  | 0.098(3)  | 0.117(6)  |           |
| C9A        |           |           |            |           |           |           | 0.093(7)  |           |
| C10        | 0.019(2)  | 0.026(1)  | 0.038(2)   | 0.061(2)  | 0.075(2)  | 0.094(3)  | 0.101(6)  |           |
| C10A       |           |           |            |           |           |           | 0.096(6)  |           |
| C11        | 0.016(2)  | 0.022(1)  | 0.033(2)   | 0.053(2)  | 0.070(2)  | 0.094(3)  | 0.100(6)  |           |
| C11A       |           |           |            |           |           |           | 0.094(7)  |           |
| C12        | 0.017(2)  | 0.024(1)  | 0.037(2)   | 0.057(2)  | 0.068(2)  | 0.084(3)  | 0.092(6)  |           |
| C12A       |           |           |            |           |           |           | 0.091(6)  |           |
